# Supplementary material for: Tuning surface micropattern features using a shape memory functional polymer
Source: Royal Society of Chemistry journal article supplement (doi:10.1039/c3ra41217b), 2013-01-01
Supplement: c3ra41217b.pdf [file c3ra41217b.pdf]

### Support Information:

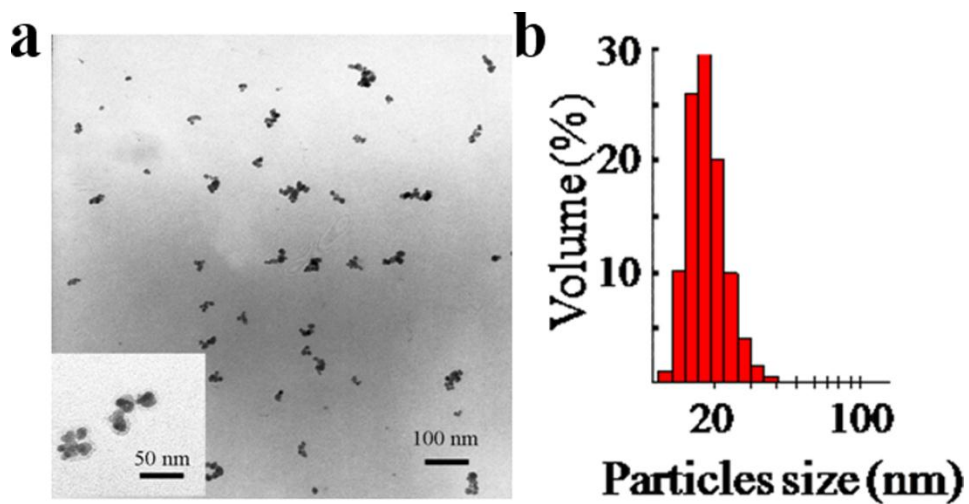

**Fig. S1** (a) TEM micrograph and (b) DLS image of Fe<sub>3</sub>O<sub>4</sub> nanoparticles synthesized using a co-precipitation technique.

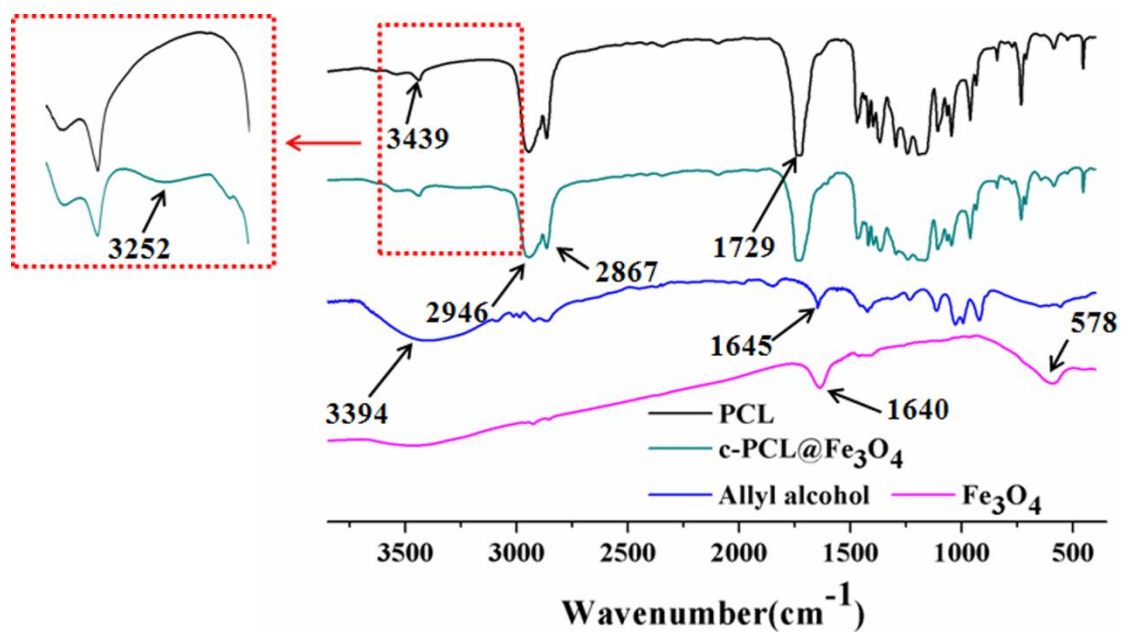

**Fig. S2** FT-IR spectra of PCL, Fe<sub>3</sub>O<sub>4</sub>/c- PCL@AL, allyl alcohol and Fe<sub>3</sub>O<sub>4</sub>.

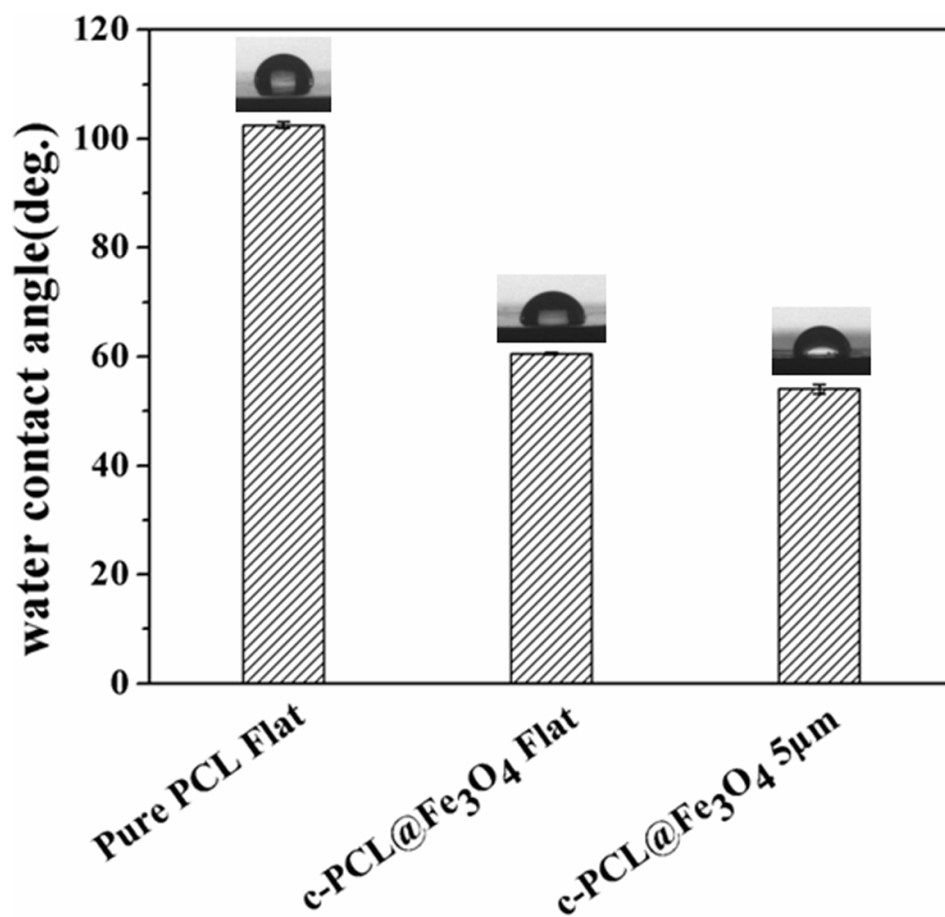

**Fig. S3** Water contact angle of pure PCL flat, c-PCL@Fe<sub>3</sub>O<sub>4</sub> flat, and c-PCL@Fe<sub>3</sub>O<sub>4</sub> 5 µm micropillars, respectively.
